# Supplementary material for: Synergistic nanoplatform of M1 macrophage-derived extracellular vesicles and MoS 2 for tumor-targeted photoimmunotherapy in bladder cancer
Source: Royal Society of Chemistry journal article supplement (doi:10.1039/d5nr00374a), 2025-01-01
Supplement: d5nr00374a1.pdf [file d5nr00374a1.pdf]

# Synergistic Nanoplatform of M1 Macrophage-Derived Extracellular Vesicles and MoS<sub>2</sub> for Tumor-Targeted Photoimmunotherapy in Bladder Cancer

## Supplementary data

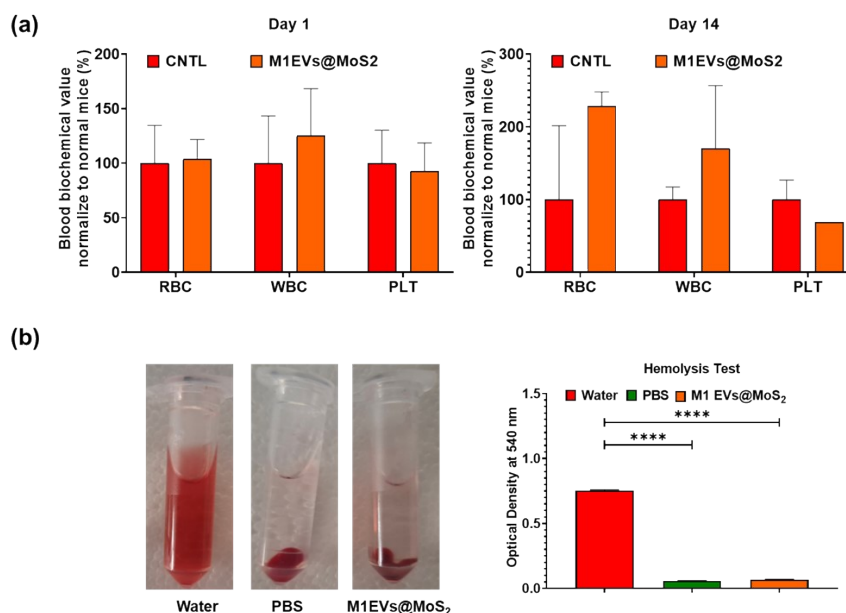

**Figure S1: Blood compatibility of M1-EVs@MoS<sub>2</sub>.** (a) Blood biochemical analysis on Days 1 and 14 showed stable RBC and PLT levels with a mild WBC increase, indicating no hematological toxicity. (b) Hemolysis assay showed minimal lysis with M1-EVs@MoS<sub>2</sub>, confirming good hemocompatibility.

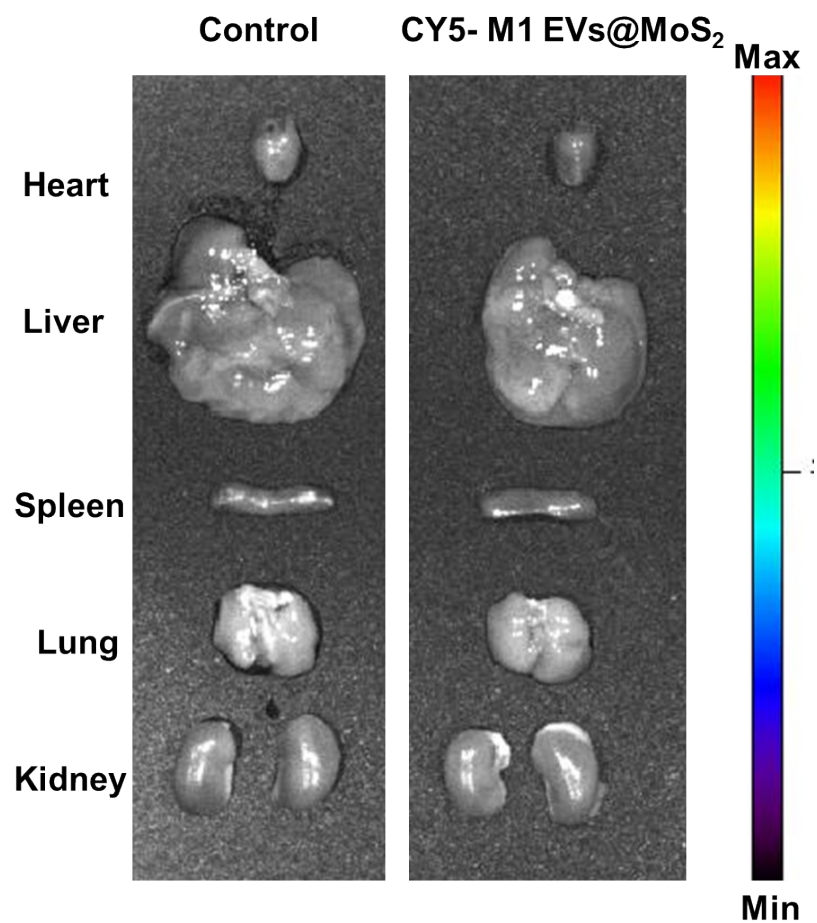

**Figure S2:** IVIS imaging of Cy5-labeled M1-EVs@MoS<sub>2</sub> showing in vivo biodistribution over time. Initial strong fluorescence at the tumor site gradually diminished, with no detectable signal by Day 14, indicating effective clearance and minimal long-term accumulation.
